# Supplementary material for: Diagnostic Performance of Coronary Angiography by 64-Row CT
Source: Atypon-hosted journal article supplement (doi:10.1056/nejmoa0806576), 2008-11-26
Supplement: nejm_miller_2324sa1.pdf [file nejm_miller_2324sa1.pdf]

## Supplementary Appendix

This appendix has been provided by the authors to give readers additional information about their work.

Supplement to: Miller JM, Rochitte CE, Dewey M, et al. Diagnostic performance of coronary angiography by 64-row CT. *N Engl J Med* 2008;359:2324-36.

## MDCTA Core Laboratory

### Raw/Image Data

- Reconstruction of Systolic & Diastolic Phases
- Standard & Sharp Convolution Kernel
- Coronary Artery Calcification Assessment (Agatston Score)

### Coronary Artery Tree Segmentation<sup>\*†</sup>

- Segmentation based on fiducial landmarks
- Vessel Size Determination ( $\geq 1.5\text{mm}$ )

### Segment Assessment<sup>‡</sup>

- 2 independent readers performed assessment
- Identification of reference diameter & minimal lumen diameter
- Visual assessment (categorical scale)
  - No disease, 1-29%, 30-49%, 50-69%, 70-99%, 100%
- Quantitative assessment (continuous scale)

Reader 1                      Reader 2

### Database/Statistical Core Lab

- Reader 1 & Reader 2 readings locked
- Ineligible segments by CCA removed

#### Concordant Reads

- Readers scores averaged

#### Discordant Reads

- Scores crossing thresholds (50%, 70%, or unevaluable) identified for consensus

#### Consensus

- Final diameter stenosis determined by consensus with 3<sup>rd</sup> observer

### Final Segment Diameter Stenosis<sup>||</sup>

- Cross modality alignment of segments

### Vessel Diameter Stenosis

- LAD = maximum segment diameter stenosis in L1-L6
- LCX = maximum segment diameter stenosis in C1-C8
- RCA = maximum segment diameter stenosis in R1-R5

### Patient Diameter Stenosis

- Maximum diameter stenosis in all segments

\*Coronary Artery segmentation model modified from the CASS<sup>1</sup> and BARI<sup>2</sup> investigators used for the CORE-64 trial (with 19 segments; 5 in the right coronary artery, 6 in the left anterior descending coronary artery [including left main], 7 in the left circumflex coronary artery, and the intermediate branch). Segmentation performed independently by blinded angiography and computed tomography core labs.

<sup>‡</sup> For segments with multiple lesions, the most severe lesion and stenosis determined the segment final segment stenosis value.

<sup>||</sup> In the visual analysis, non-evaluable segments were consensus derived. In the quantitative analysis segments which could not be measured by all 3 observers were considered non-evaluable.

<sup>1</sup> Ringqvist I, Fisher LD, Mock M, et al. Prognostic value of angiographic indices of coronary artery disease from the Coronary Artery Surgery Study (CASS). J Clin Invest 1983;71:1854-66.

<sup>2</sup> Alderman EL, Stadius M. The angiographic definitions of the Bypass Angioplasty Revascularization Investigation. Coronary Artery Disease 1992;3:1189-208.

Abbreviations: MDCTA, multidetector computed tomography angiography; CCA, conventional coronary angiography; LAD, left anterior descending artery; LCX, left circumflex coronary artery; RCA, right coronary artery; RPL, right posterolateral; OM, obtuse marginal; LPL, left posterolateral; PDA, posterior descending artery.

### CORE-64 Coronary Artery Segmentation<sup>†</sup>

| Artery                          | CORE-64 Segment | CASS Segment <sup>1</sup> |
|---------------------------------|-----------------|---------------------------|
| Left main                       | L1              | 11                        |
| Proximal LAD                    | L2              | 12                        |
| Mid LAD                         | L3              | 13                        |
| Distal LAD                      | L4              | 14                        |
| 1 <sup>st</sup> Diagonal Branch | L5              | 15                        |
| 2 <sup>nd</sup> Diagonal Branch | L6              | 16                        |
| Proximal RCA                    | R1              | 1                         |
| Mid RCA                         | R2              | 2                         |
| Distal RCA                      | R3              | 3                         |
| Right PDA                       | R4              | 4                         |
| Grouped RPL                     | R5              | 5,6,7,8                   |
| Proximal LCX                    | C1              | 18                        |
| Mid LCX                         | C2              | 19                        |
| 1 <sup>st</sup> OM              | C3              | 20                        |
| 2 <sup>nd</sup> OM              | C4              | 21                        |
| 3 <sup>rd</sup> OM              | C5              | 22                        |
| Grouped: distal LCX & LPL       | C6              | 19.1, 23, 24, 25, 26      |
| Left PDA                        | C7              | 27                        |
| Ramus intermediate Branch       | C8              | 28                        |
